# Supplementary material for: Exploiting oriented attachment in stabilizing La3+-doped gallium oxide nano-spindles
Source: Royal Society of Chemistry journal article supplement (doi:10.1039/c4ra07089e), 2014-01-01
Supplement: c4ra07089e1.pdf [file c4ra07089e1.pdf]

## Electronic supplementary Information

### Exploiting oriented attachment in stabilizing La<sup>3+</sup> doped gallium oxide nano-spindles

M Ibrahim Dar<sup>1,2</sup> S Sampath<sup>3</sup> and S A Shivashankar<sup>1,2\*</sup>

<sup>1</sup>Centre for Nano Science and Engineering, <sup>2</sup> Materials Research Centre, and <sup>3</sup> Department of Inorganic & Physical Chemistry, Indian Institute of Science, Bangalore 560012, India

*E-mail: shivu@cense.iisc.ernet.in; Fax: +91 80 2360 4656; Tel: +9180 2293 3323*

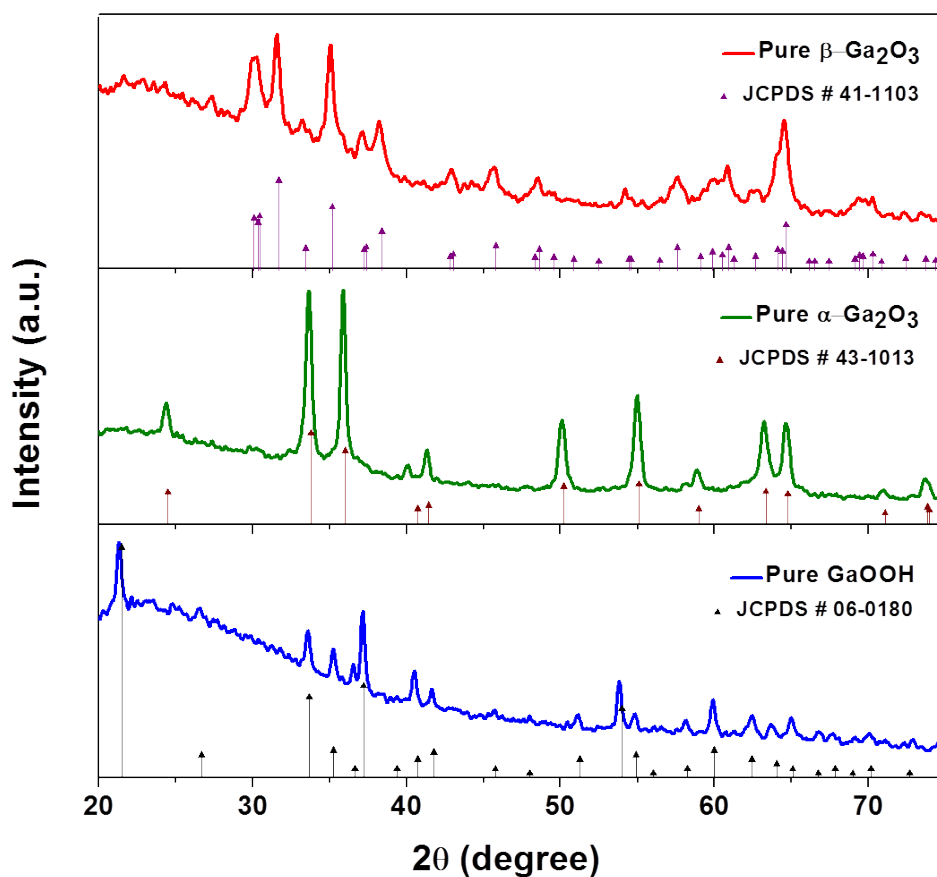

**Figure S1:** Powder X-ray diffraction patterns of pure gallium oxides nano-spindles.

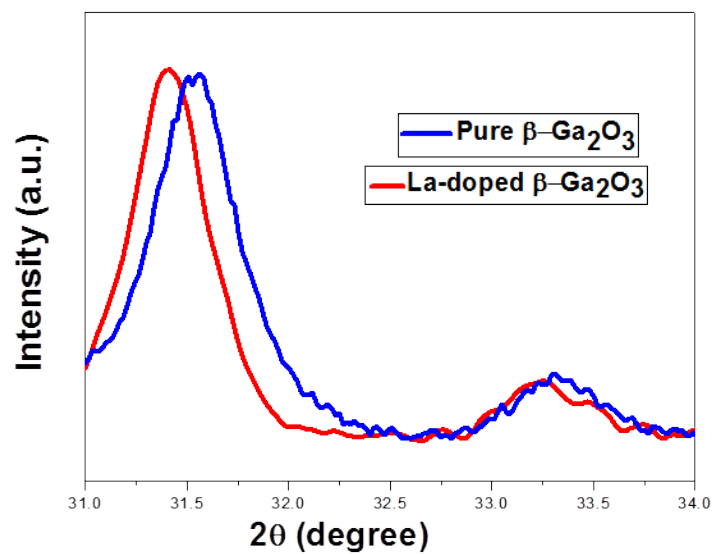

**Figure S2:** Comparative analysis of powder X-ray diffraction patterns of pure and La-doped  $\beta$ -Ga<sub>2</sub>O<sub>3</sub> nano-spindles.

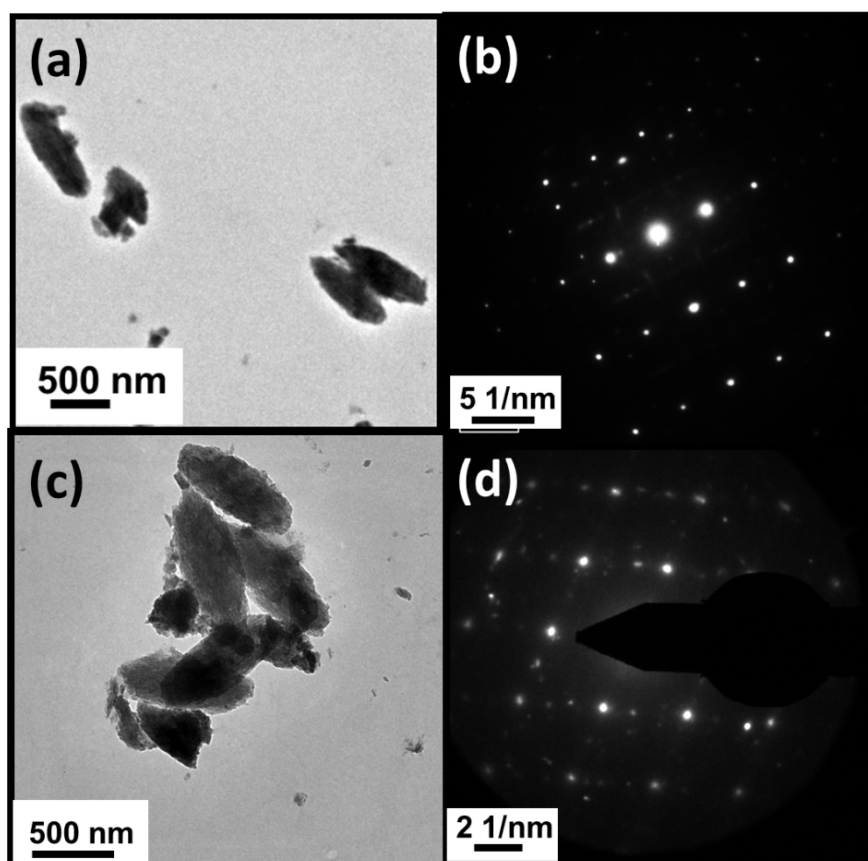

**Figure S3:** Pure (a & b) and La-doped (c & d)  $\beta$ -Ga<sub>2</sub>O<sub>3</sub> nano-spindles: (a & c) Bright-field TEM images and (b & d) SAED patterns.

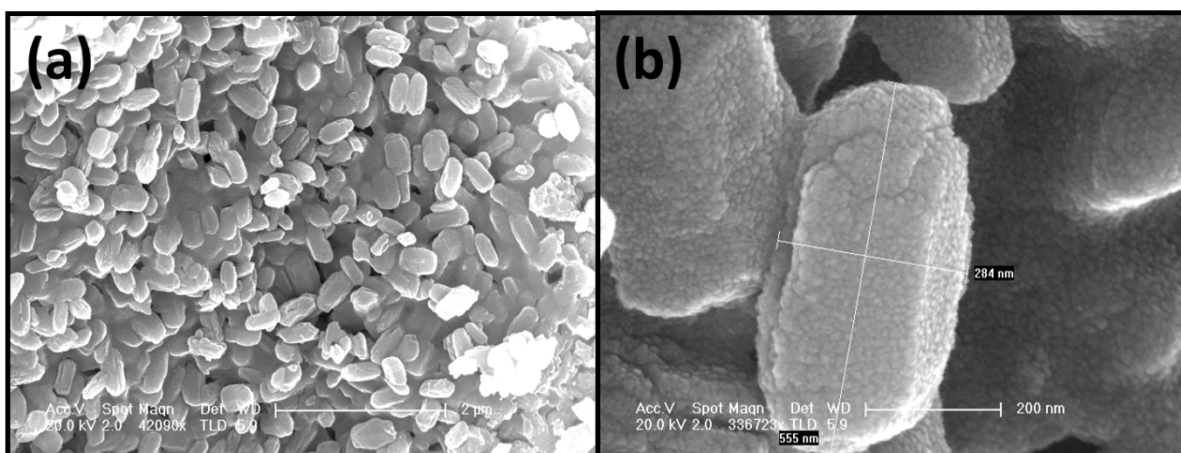

**Figure S4:** FESEM micrographs (a) low magnification (b) high magnification of pure  $\alpha$ -GaOOH nano-spindles synthesized using 0.5 M sodium azide.

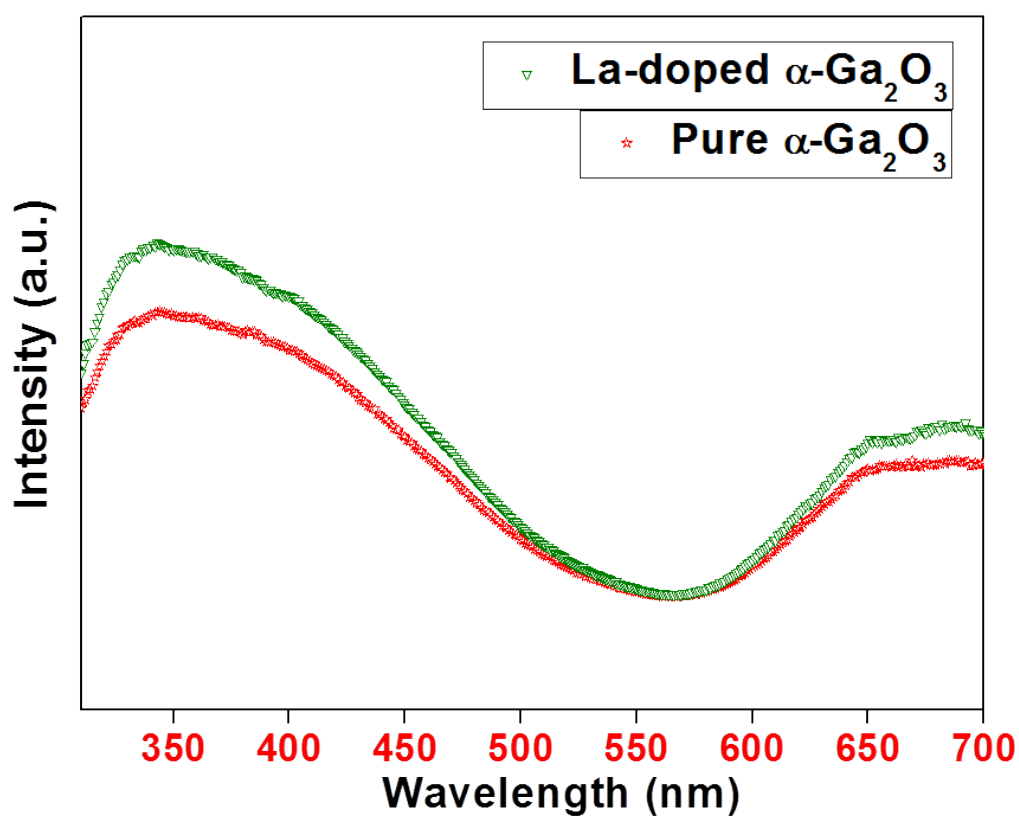

**Figure S5:** Room temperature photoluminescence spectra of undoped and La-doped  $\alpha$ -Ga<sub>2</sub>O<sub>3</sub> nano-spindles. In the main manuscript, the broad peak ranging from 300 nm to 520 nm of the photoluminescence spectrum has been deconvoluted using three peaks corresponding to UV

(~340 nm), blue (~420 nm) and green (~500 nm). The photoluminescence spectrum of the doped samples is broad and asymmetric and Gaussian curve fitting was applied in the OriginPro8 software to deconvolute the PL curves.
